# Supplementary material for: Matrix viscoelasticity drives cell cluster formation to counteract cellular senescence
Source: Royal Society of Chemistry journal article supplement (doi:10.1039/d5tb00174a), 2025-01-01
Supplement: d5tb00174a1.pdf [file d5tb00174a1.pdf]

**Matrix viscoelasticity drives cell cluster formation to counteract  
cellular senescence**

Xinying Wang, Limin Song, Jingwen Zhao, Yiling Xiong, Rongrong Jin, Jing He\*

*National Engineering Research Center for Biomaterials, College of Biomedical*

*Engineering, Sichuan University, Chengdu, 610064, PR China*

\*Corresponding author: Tel.: +86 28 8541 2923; fax: +86 28 8541 0246;

E-mail address: [jinghe30@scu.edu.cn](mailto:jinghe30@scu.edu.cn)

Table 1 Different viscoelastic PAM/Alg matrix formulation

| Groups | 40%AM | 2%BIS | UP H <sub>2</sub> O | 5%Alg | TEMED | 10%APS |
|--------|-------|-------|---------------------|-------|-------|--------|
| V_0    | 2ml   | 500μl | 7.4ml               | 0ml   | 4μl   | 100μl  |
| V_100  | 2ml   | 400μl | 3.6ml               | 4ml   | 4μl   | 100μl  |
| V_200  | 2.2ml | 200μl | 1.6ml               | 6ml   | 4μl   | 100μl  |
| V_300  | 3.2ml | 40μl  | 0ml                 | 6.8ml | 4μl   | 100μl  |

SI Table. 1. The preparation method of viscoelastic matrix is mixed into glue in one step according to the above ratio.

Table 2 Primer sequences for RT-qPCR

| 引物名称     | 引物序列                     |
|----------|--------------------------|
| GAPDH-F  | CAGTGGCAAAGTGGAGATTGTTG  |
| GAPDH-R  | TCGCTCCTGGAAGATGGTGAT    |
| Cdkn1a-F | TCCCGACTCTTGACATTGCT     |
| Cdkn1a-R | AGTATGGGGTGGGGGAAAAG     |
| Cdkn2a-F | GGTGATGATGATGGGCAACG     |
| Cdkn2a-R | GAGAAGGTAGTGGGGTCCTC     |
| Cxcl12-F | CAAGTGTGCATTGACCCGAAATT  |
| Cxcl12-R | GAAGAGGGAGGAGCGAGTTACAA  |
| Rock2-F  | TGCAATACACTCCATGGGCTTA   |
| Rock2-R  | A                        |
| Ctnnb1-F | GATTTTCAGAACCTCGGGCGATAT |
| Ctnnb1-R | AACCTTTCAGATGCAGCGACTAA  |
| Gja1-F   | GCTGCACAGGTGACCACATTTAT  |
| Gja1-R   | ATCGCGTGAAGGGAAGAAGC     |
|          | TCGCTGGCTTGCTTGTTGTA     |

SI Table. 2. The primer sequence of the gene designed in the experiment.

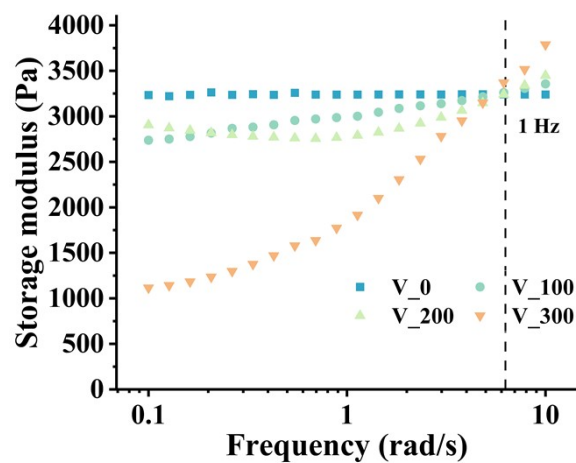

SI Fig. 1. The variation of storage modulus with frequency for all groups.

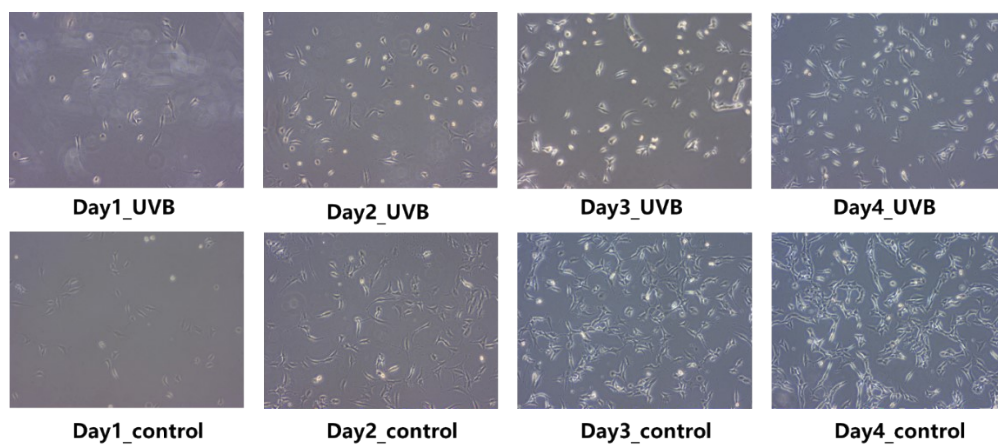

SI Fig. 2. Preliminary experiment on the establishment of UV-induced cell senescence model. NIH3T3 cells were inoculated on the culture plate, and the experimental group was subjected to ultraviolet irradiation experiment from the second day, and the cell status was observed and recorded daily through the optical microscope.

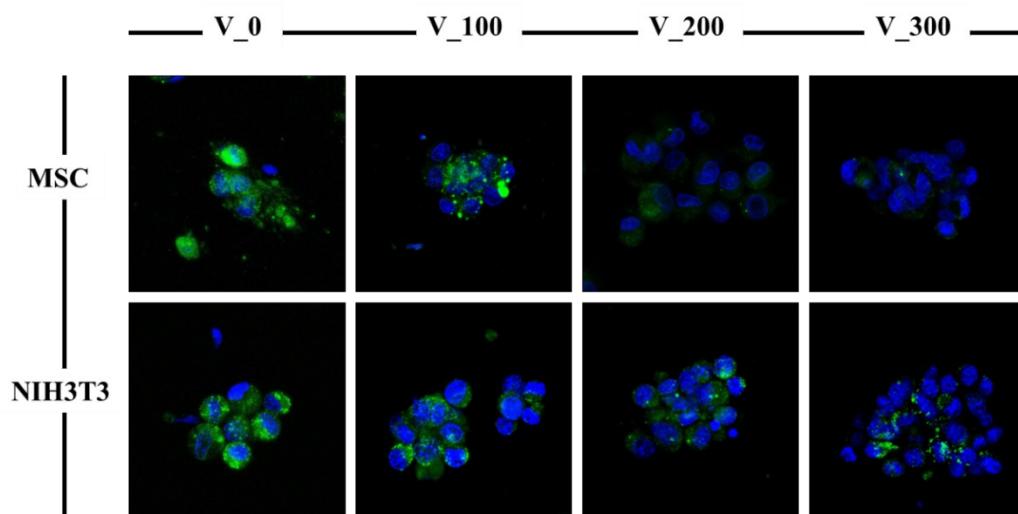

SI Fig. 3. Validation of H<sub>2</sub>O<sub>2</sub>-Induced Cellular Senescence Model in MSCs and NIH-3T3 Cells. The concentration of H<sub>2</sub>O<sub>2</sub> was determined to be 800  $\mu$ M based on preliminary experiments. Cells were exposed to this concentration for 4 hours, followed by a 24 h incubation in fresh medium before performing SA- $\beta$ -gal staining to assess cellular senescence.

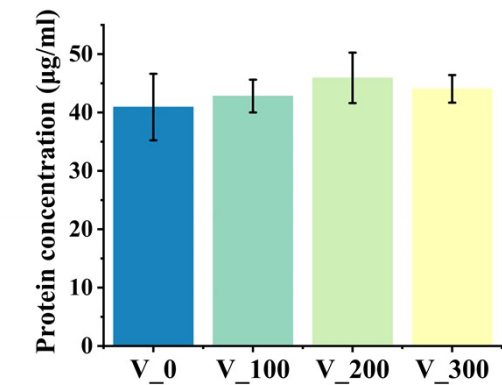

SI Fig. 4. Protein content of materials with different groups. Protein concentration comparison of materials with different groups after soaking in equal volumes of culture medium for 2 days; equal weights of samples were lysed with 1% Triton X-100 at a 1:5 ratio, followed by BCA assay measurement.

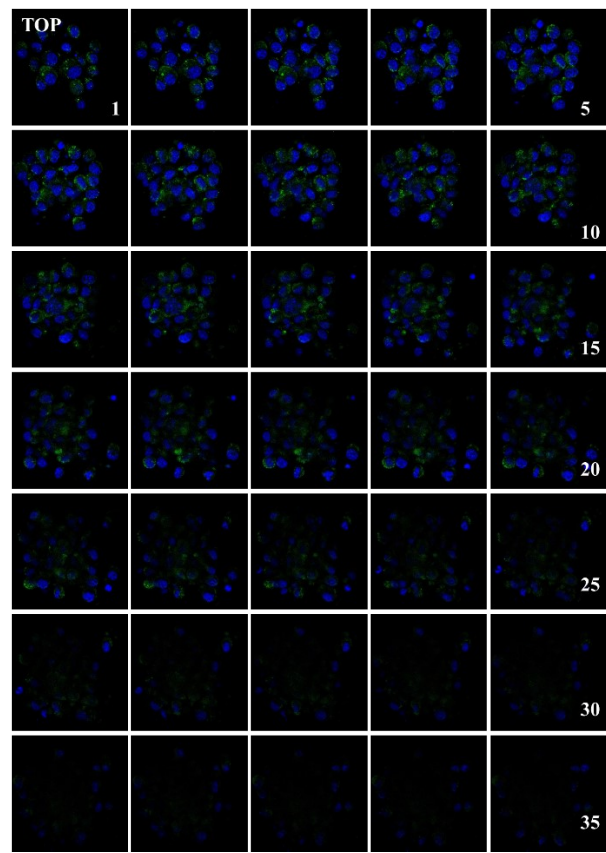

SI Fig. 5. Cell senescence in different spatial layers of spherical cell aggregates of

group V\_300.

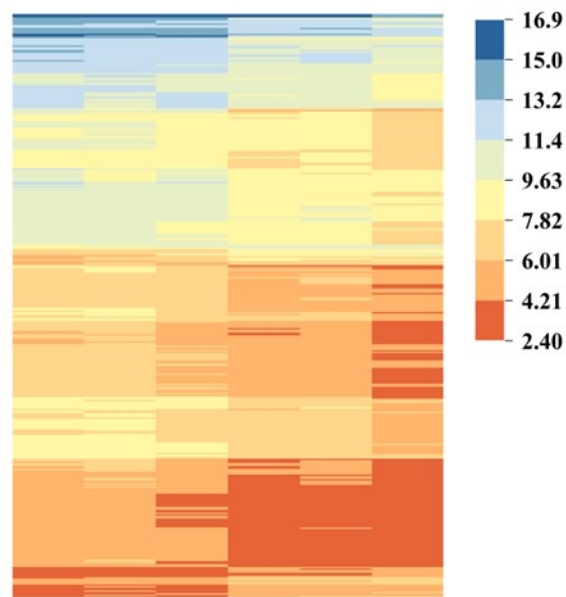

SI Fig. 6. Volcano map of all different genes in group V\_0 and group V\_300.

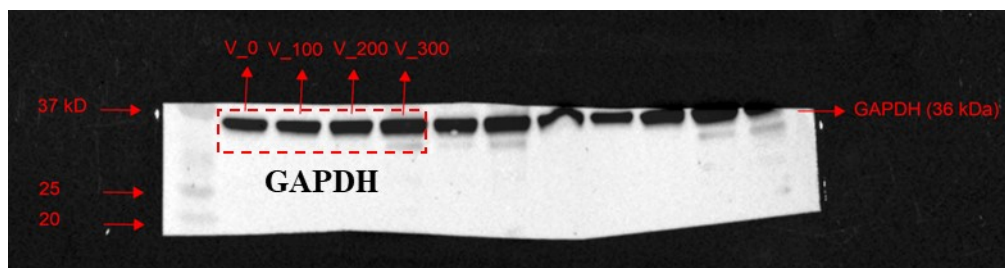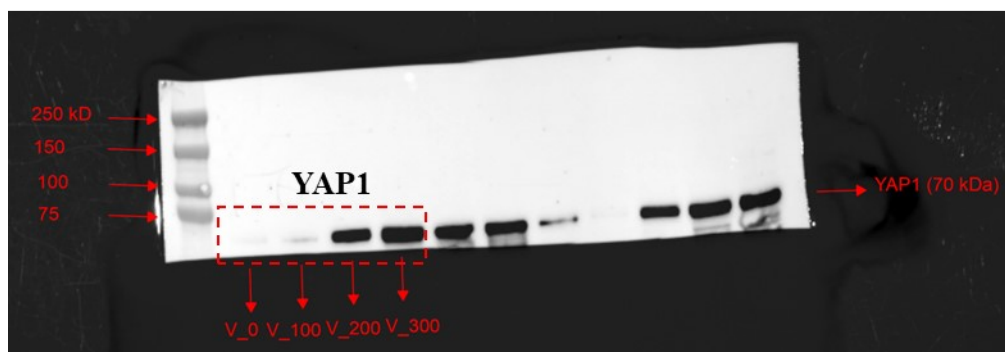

SI Fig.7. Original blots.
